# Supplementary material
Source: HighWire-hosted journal article supplement (https://bmjopen.bmj.com/content/9/11/e031220)
Supplement: inline-supplementary-material-1 [file inline-supplementary-material-1.pdf]

Supplementary file 1. PubMed search.

(exercise OR physical activity OR physical fitness OR strength training OR weight training) AND (children OR adolescen\* OR boys OR girls) AND (overweight OR obes\*) AND random\* AND ( "1973/01/01"[125] : "2018/08/22"[125] ) AND Humans[Mesh] AND (infant[MeSH] OR child[MeSH] OR adolescent[MeSH])
