# Supplementary material
Source: HighWire-hosted journal article supplement (https://bmjopen.bmj.com/content/9/11/e031220)
Supplement: inline-supplementary-material-2 [file inline-supplementary-material-2.pdf]

Supplementary file 2. Planned covariates to examine.

---

| Characteristics | Variable                                                                                                                                                                                                                                                                                                                                                      |
|-----------------|---------------------------------------------------------------------------------------------------------------------------------------------------------------------------------------------------------------------------------------------------------------------------------------------------------------------------------------------------------------|
| Study           | Publication year, impact factor of journal, country study conducted, type of control group, bias (sequence generation, allocation concealment, blinding of participants & personnel, blinding of outcome assessors, incomplete outcome data, selective outcome reporting), type of analysis, funding                                                          |
| Participant     | Age, gender, race/ethnicity, maturational stage                                                                                                                                                                                                                                                                                                               |
| Exercise        | Type (aerobic, strength, both), length, frequency, intensity, duration, total minutes, total minutes (adjusted for compliance), mode, compliance, exercise supervision, setting, number of sets, number of repetitions, rest between sets, number of exercises, type of resistance, equipment used, fidelity (design, training, delivery, receipt, enactment) |
| Outcome         | Baseline values for primary outcomes (BMI in kg·m <sup>2</sup> , fat mass, percent fat), method used to assess adiposity, i.e., instrumentation                                                                                                                                                                                                               |

---
