# Supplementary material
Source: HighWire-hosted journal article supplement (https://bmjopen.bmj.com/content/9/11/e031220)
Supplement: inline-supplementary-material-5 [file inline-supplementary-material-5.pdf]

## Supplementary file 5. Study-level risk of bias assessment results.

| Study                  | Random sequence generation | Allocation concealment | Blinding (participants & personnel) | Blinding (outcome assessors) | Incomplete outcome data | Selective reporting | Physically inactive |
|------------------------|----------------------------|------------------------|-------------------------------------|------------------------------|-------------------------|---------------------|---------------------|
| Ackel-D'Elia et al.*   | low                        | unclear                | high                                | unclear                      | unclear                 | low                 | unclear             |
| Alberga et al.         | low                        | low                    | high                                | unclear                      | high                    | unclear             | unclear             |
| Alves et al.           | low                        | unclear                | high                                | unclear                      | low                     | unclear             | unclear             |
| Andre & Beguier        | low                        | unclear                | high                                | unclear                      | unclear                 | unclear             | unclear             |
| Ben Ounis et al.       | low                        | unclear                | high                                | unclear                      | unclear                 | unclear             | low                 |
| Berntsen et al.        | low                        | unclear                | high                                | unclear                      | low                     | unclear             | unclear             |
| Cao et al.             | low                        | unclear                | high                                | unclear                      | unclear                 | unclear             | unclear             |
| Chang et al.           | high                       | unclear                | high                                | unclear                      | unclear                 | unclear             | unclear             |
| Chen et al.            | low                        | unclear                | high                                | unclear                      | unclear                 | unclear             | unclear             |
| Chen et al.            | low                        | unclear                | high                                | unclear                      | high                    | unclear             | unclear             |
| Cheng et al.           | low                        | unclear                | high                                | unclear                      | unclear                 | unclear             | unclear             |
| Davis et al.           | low                        | low                    | high                                | high                         | low                     | low                 | low                 |
| Elloumi et al.         | low                        | unclear                | high                                | unclear                      | unclear                 | unclear             | high                |
| Farpour-Lambert et al. | low                        | low                    | high                                | low                          | low                     | low                 | low                 |
| Fazelifar et al.       | low                        | unclear                | high                                | unclear                      | low                     | unclear             | low                 |
| Fiorilli et al.        | low                        | unclear                | high                                | unclear                      | low                     | unclear             | low                 |
| Ghorbanian et al.      | low                        | unclear                | high                                | unclear                      | unclear                 | unclear             | low                 |
| Gutin et al.           | low                        | unclear                | high                                | unclear                      | low                     | unclear             | unclear             |
| Hagstromer et al.      | low                        | unclear                | high                                | unclear                      | high                    | low                 | high                |
| Hay et al.             | low                        | low                    | high                                | low                          | low                     | low                 | unclear             |

|                 |     |         |      |         |         |         |         |
|-----------------|-----|---------|------|---------|---------|---------|---------|
| Karacabey       | low | unclear | high | unclear | unclear | unclear | low     |
| Kelly et al.    | low | unclear | high | unclear | unclear | low     | unclear |
| Kelly et al.    | low | low     | high | unclear | low     | unclear | unclear |
| Kim et al.      | low | unclear | high | unclear | unclear | unclear | low     |
| Kim et al.      | low | unclear | high | unclear | high    | unclear | unclear |
| Lau et al.      | low | unclear | high | unclear | unclear | unclear | unclear |
| Lee et al.      | low | low     | high | unclear | low     | unclear | low     |
| Lee et al.      | low | low     | high | unclear | low     | unclear | low     |
| Li et al.       | low | unclear | high | unclear | low     | unclear | unclear |
| Maddison et al. | low | low     | high | high    | low     | low     | high    |
| McNarry et al.  | low | low     | high | unclear | unclear | high    | unclear |
| Meyer et al.    | low | unclear | high | unclear | high    | low     | low     |
| Monteiro et al. | low | unclear | high | unclear | unclear | low     | unclear |
| Murphy et al.   | low | unclear | high | unclear | unclear | low     | unclear |
| Nobre et al.    | low | unclear | high | unclear | unclear | unclear | unclear |
| Owens et al.    | low | unclear | high | unclear | low     | unclear | unclear |
| Park et al.     | low | unclear | high | unclear | low     | low     | unclear |
| Racil et al.    | low | unclear | high | unclear | unclear | unclear | low     |
| Racil et al.    | low | unclear | high | unclear | unclear | unclear | low     |
| Rooney et al.   | low | unclear | high | unclear | low     | low     | unclear |
| Saygin & Ozturk | low | unclear | high | unclear | unclear | unclear | unclear |

|                     |      |         |      |         |         |         |         |
|---------------------|------|---------|------|---------|---------|---------|---------|
| Schranz et al.      | low  | unclear | high | high    | low     | low     | unclear |
| Seo et al.          | low  | unclear | high | unclear | high    | unclear | unclear |
| Shaibi et al.       | low  | unclear | high | unclear | high    | low     | unclear |
| Sigal et al.        | low  | low     | high | unclear | low     | unclear | low     |
| Silva et al.        | low  | unclear | high | unclear | high    | unclear | unclear |
| Song et al.         | low  | unclear | high | low     | high    | unclear | low     |
| Staiano et al.      | low  | low     | high | low     | low     | low     | unclear |
| Sun et al.          | low  | unclear | high | unclear | low     | unclear | unclear |
| Tan et al.          | high | high    | high | unclear | low     | unclear | unclear |
| Vasconcellos et al. | low  | low     | high | low     | high    | low     | low     |
| Watts et al.        | low  | unclear | high | unclear | unclear | unclear | unclear |
| Watts et al.        | low  | unclear | high | unclear | unclear | unclear | unclear |
| Weintraub et al.    | low  | unclear | high | high    | low     | low     | unclear |
| Wong et al.         | low  | unclear | high | unclear | low     | unclear | unclear |
| Youssef et al.      | low  | low     | high | unclear | unclear | unclear | low     |
| Zehsaz et al.       | low  | unclear | high | unclear | unclear | unclear | unclear |
